# Supplementary material
Source: MDPI journal article supplement (https://www.mdpi.com/2071-1050/14/24/16769)
Supplement: s1 [file s1]

Table S1: Research included in the review

| No. | Author                | Publication year | Geographical focus                                                     | Industry/ Sector | Sample Size      | Sample Tweet Number       | Journal                                                                 |
|-----|-----------------------|------------------|------------------------------------------------------------------------|------------------|------------------|---------------------------|-------------------------------------------------------------------------|
|     |                       |                  |                                                                        |                  | Twitter Accounts | Tweets/ Retweets/ Replies |                                                                         |
| 1   | Amin et al.           | 2021             | UK                                                                     |                  | not disclosed    | 67.908                    | International Journal of Accounting Information Systems                 |
| 2   | Baboukardos et al.    | 2021             | global, Canada, USA, Australia, China, Japan, Germany, Italy, Spain UK |                  | 483              | 4.484                     | Corporate Governance: The International Journal of Business in Society  |
| 3   | Burton et al.         | 2017             | USA                                                                    |                  | 63               | 32.641                    | The Journal of Brand Management : An International Journal              |
| 4   | Chae & Park           | 2018             | global                                                                 |                  | not disclosed    | 178.908                   | Sustainability                                                          |
| 5   | Cortado & Chalmers    | 2016             | Spain                                                                  |                  | 20               | 5.106 + 416 FB postings   | Cogent Business & Management                                            |
| 6   | Dong & Rim            | 2018             | USA                                                                    |                  | 65               | 5.859                     | Public Relations Review                                                 |
| 7   | Esposito et al.       | 2021             | Italy                                                                  | Education        | 1                | not disclosed             | Administrative Sciences                                                 |
| 8   | Etter                 | 2013             | global                                                                 |                  | 30               | 41.864                    | Public Relations Review                                                 |
| 9   | Etter                 | 2014             | global                                                                 |                  | 30               | 41.864                    | Journal of Communication Management                                     |
| 10  | Fröhlich & Knobloch   | 2021             | Germany                                                                |                  | 36               | 154.770                   | Public Relations Review                                                 |
| 11  | Giacomini et al.      | 2021             | Italy                                                                  | News Media       | 6                | 6.666                     | Corporate Governance: The International Journal of Business in Society. |
| 12  | Gómez-Carrasco et al. | 2021             | Spain                                                                  | Banking          | 41               | 2.816                     | The European Accounting Review                                          |
| 13  | Grover et al.         | 2019             | global                                                                 |                  | 93               | 194.644                   | International Journal of Information Management                         |
| 14  | Holiday et al.        | 2021             | global                                                                 | Consumer Brands  | 3.093            | 44.432                    | Journal of Interactive Advertising                                      |
| 15  | Jiang & Park          | 2022             | global                                                                 |                  | 71               | 22.951                    | Public Relations Review                                                 |
| 16  | Joo et al.            | 2021             | USA                                                                    | Alcohol          | 175*             | n.a.                      | International Journal of Advertising                                    |
| 17  | Kaul & Chaudhri       | 2019             | India                                                                  |                  | 34               | 4.091                     | CSR Communication Conference                                            |
| 18  | Kollat & Farache      | 2017             | UK                                                                     |                  | 507*             | n.a.                      | The Journal of Consumer Marketing                                       |
| 19  | Lee et al.            | 2013             | global                                                                 |                  | 222              | not disclosed             | Journal of Business Ethics                                              |
| 20  | Lee et al.            | 2019             | USA                                                                    | Alcohol          | 177*             | n.a.                      | Journal of Interactive Advertising                                      |
| 21  | Lee et al.            | 2020             | USA                                                                    | Alcohol          | 839*             | n.a.                      | Journal of Interactive Advertising                                      |

Table S1: Research included in the review

|    |                                                       |      |                                             |                    |                     |               |                                                                                                                                    |
|----|-------------------------------------------------------|------|---------------------------------------------|--------------------|---------------------|---------------|------------------------------------------------------------------------------------------------------------------------------------|
| 22 | Maani-Hessari et al.                                  | 2019 | UK, Ireland, Australia                      | Alcohol            | 6                   | 1.805         | International Journal of Environmental Research and Public Health                                                                  |
| 23 | Maiorescu-Murphy                                      | 2022 | USA                                         |                    | 5                   | 2.217         | Public Relations Review                                                                                                            |
| 24 | Mamic & Almaraz                                       | 2013 | Spain                                       |                    | 35                  | 5.352         | International journal of market research                                                                                           |
| 25 | Okazaki et al.                                        | 2020 | global                                      |                    | 8                   | 428.000       | Journal of Business Research                                                                                                       |
| 26 | Overton et al.                                        | 2021 | USA                                         |                    | 219*                | n.a.          | Public Relations Review                                                                                                            |
| 27 | Patuelli et al.                                       | 2021 | Italy                                       |                    | 417                 | 917.864       | PLOS ONE                                                                                                                           |
| 28 | Pilar et al.<br>Ivana Tichál<br>and Martina Chalupová | 2019 | global                                      |                    | 223.476             | 414.926       | Sustainability                                                                                                                     |
| 29 | Pons et al.                                           | 2021 | global                                      | Mining             | not disclosed       | 2.000.000     | Resources Policy                                                                                                                   |
| 30 | Reilly & Larya                                        | 2018 | global                                      | Consumer Apparel   | 11                  | 187.177       | Environmental Communication                                                                                                        |
| 31 | Rodríguez & Chalmeta                                  | 2020 | global                                      |                    | 50                  | 127.811       | International Journal of Web Based Communities                                                                                     |
| 32 | Saxton et al.                                         | 2019 | global                                      |                    | 38                  | 1.125         | Journal of Business Ethics                                                                                                         |
| 33 | Saxton et al.                                         | 2021 | global                                      |                    | 42                  | 163.402       | Journal of business ethics                                                                                                         |
| 34 | Shi                                                   | 2020 | global                                      |                    | 41                  | 1.079         | International Journal of Strategic Communication                                                                                   |
| 35 | Steenkamp Rensburg                                    | 2018 | South Africa                                | Banking            | 2                   | 2.719         | Communicatio                                                                                                                       |
| 36 | Suárez-Rico et al.                                    | 2018 | Chile, Colombia, Mexico, Peru               |                    | 93                  | 1.657         | Sustainability                                                                                                                     |
| 37 | Uzunoglu et al.                                       | 2017 | Turkey                                      |                    | 253*                | n.a.          | Public Relations Review                                                                                                            |
| 38 | Vo et al.                                             | 2019 | USA                                         | Airline            | 6                   | not disclosed | Journal of Business Ethics                                                                                                         |
| 39 | Watts et al.                                          | 2019 | International with focus on UK, USA & Japan | Tabacco            | 4                   | 3.301         | Tabacco Control                                                                                                                    |
| 40 | Xu & Saxton                                           | 2019 | USA                                         |                    | 198                 | not disclosed | Nonprofit and Voluntary Sector Quarterly : Journal of the Association for Research on Nonprofit Organizations and Voluntary Action |
| 41 | Yuan                                                  | 2019 | China, Japan                                |                    | 30 + 54 FB accounts | 2.672         | Chinese Journal of Communication                                                                                                   |
| 42 | Zhou et al.                                           | 2022 | global                                      | Container Shipping | 8                   | 6.566         | Marine Policy                                                                                                                      |

Table S1: Research included in the review

\*experiment participants
